# Supplementary material for: Foodborne Diseases in the Edible Insect Industry in Europe—New Challenges and Old Problems
Source: Foods. 2023 Feb 10;12(4):770. doi: 10.3390/foods12040770 (PMC9956073; doi:10.3390/foods12040770)
Supplement: Supplementary file 1 [file foods-12-00770-s001.zip]

Archive with 8 entries (8 files):
- Supplementary Figure S1.pdf
- Supplementary Figure S1.svg
- Supplementary Figure S2.pdf
- Supplementary Figure S2.svg
- Supplementary Figure S3.pdf
- Supplementary Figure S3.svg
- Supplementary Figure S4.pdf
- Supplementary Figure S4.svg
