# Supplementary figures and images for: Foodborne Diseases in the Edible Insect Industry in Europe—New Challenges and Old Problems
Source: MDPI journal article supplement (doi:10.3390/foods12040770), 2023-02-10

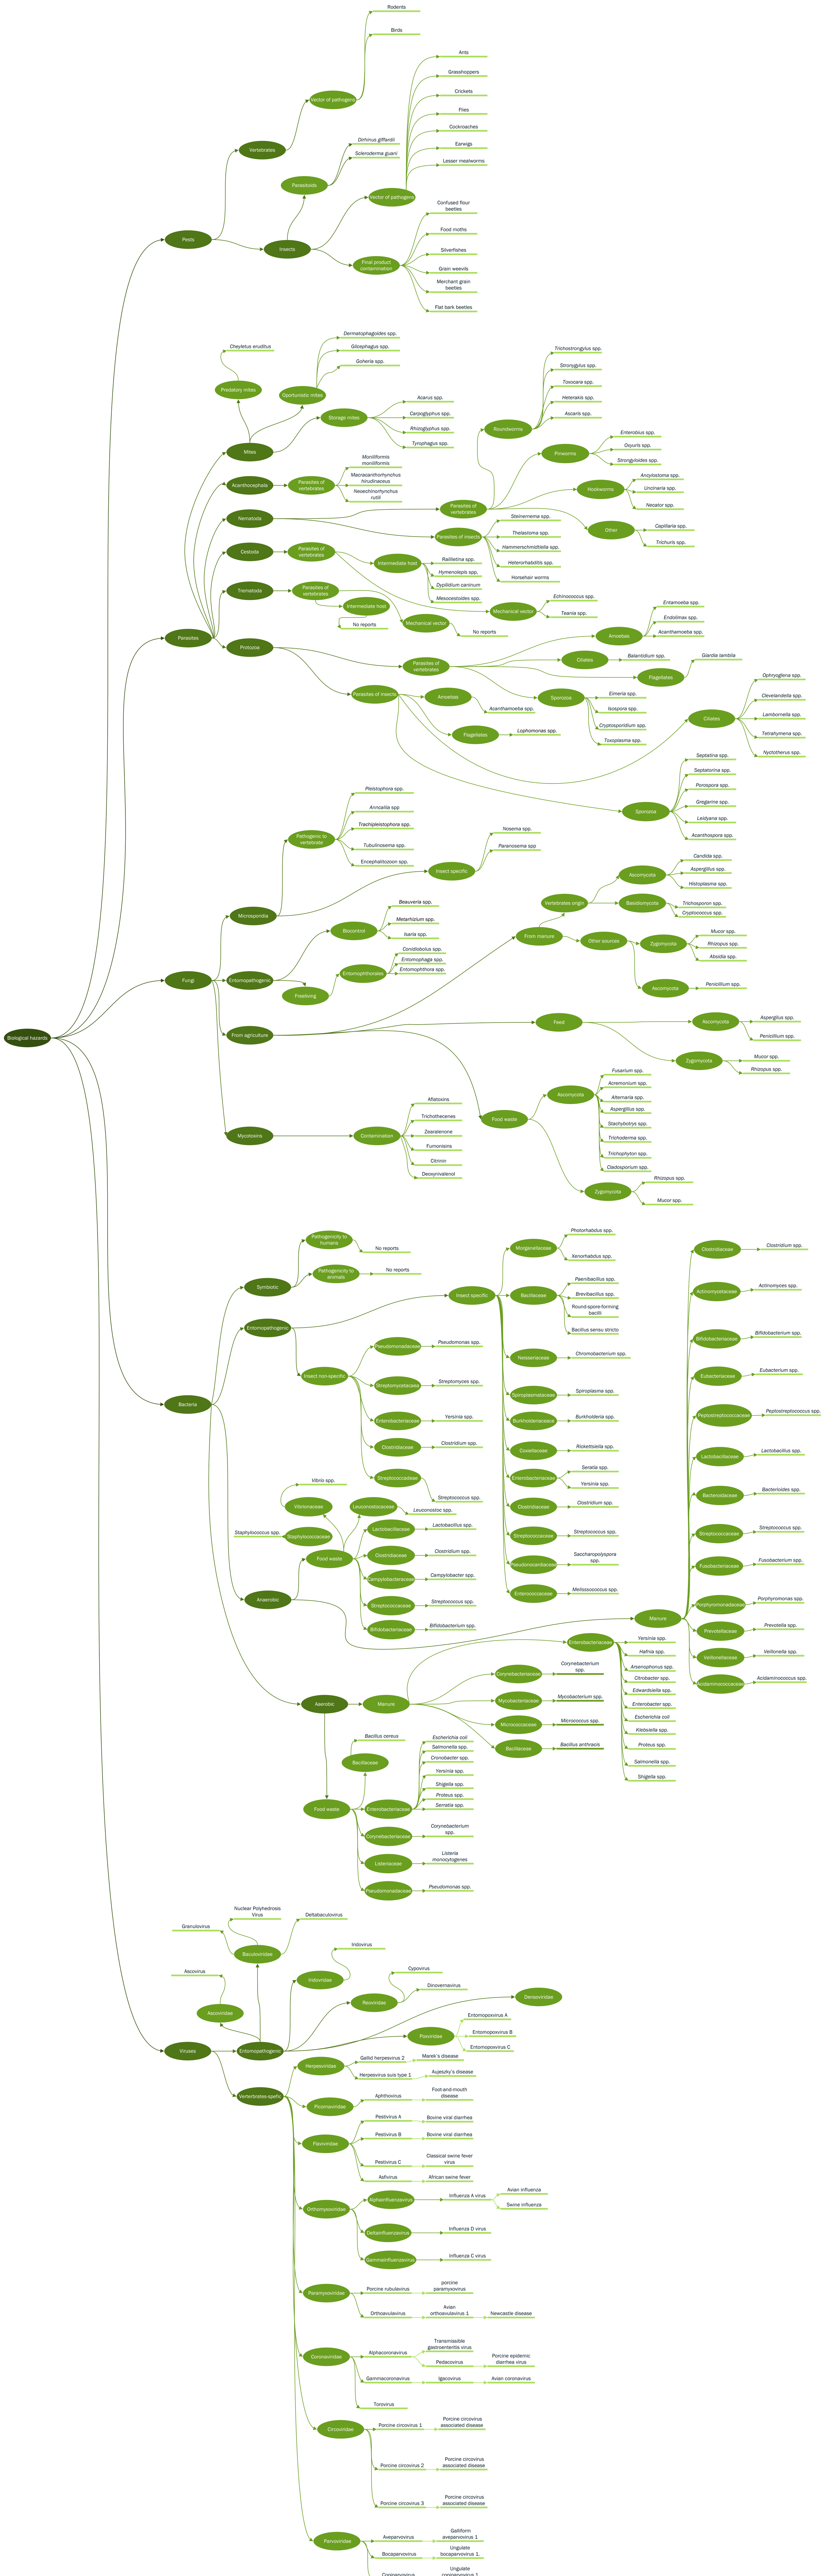

Supplement: s1 [file s1]

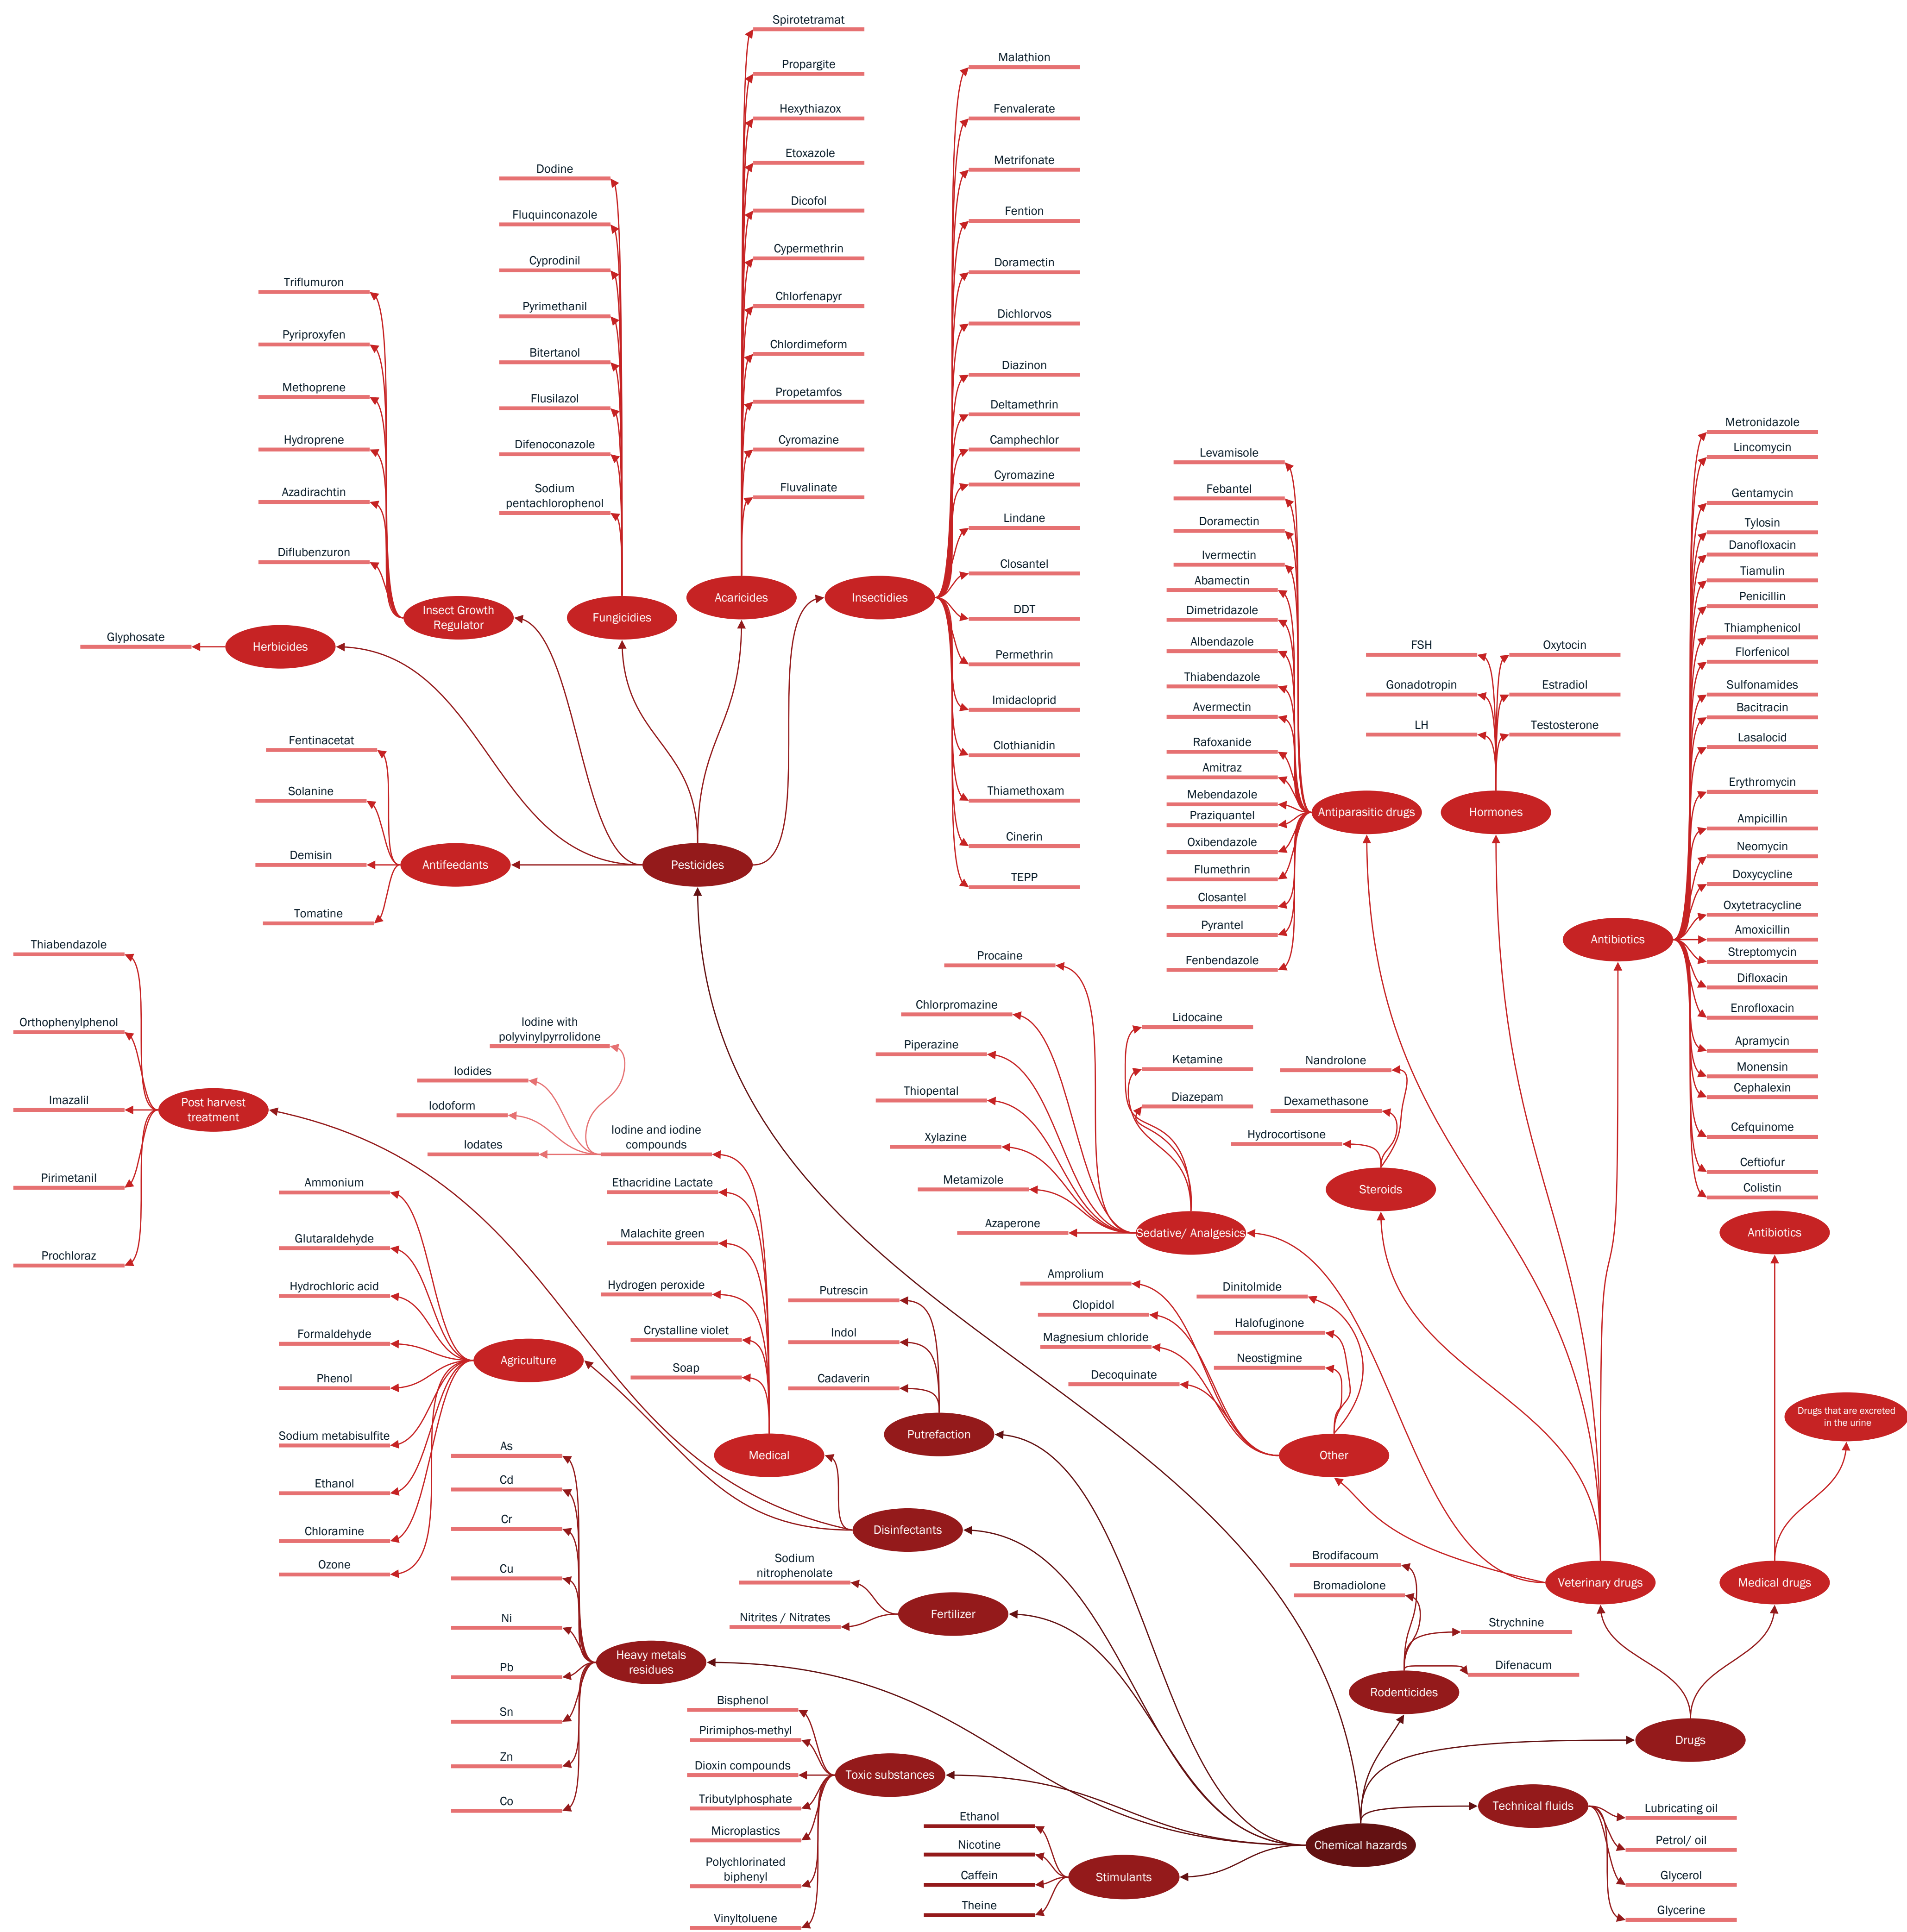

Supplement: s1 [file s1]

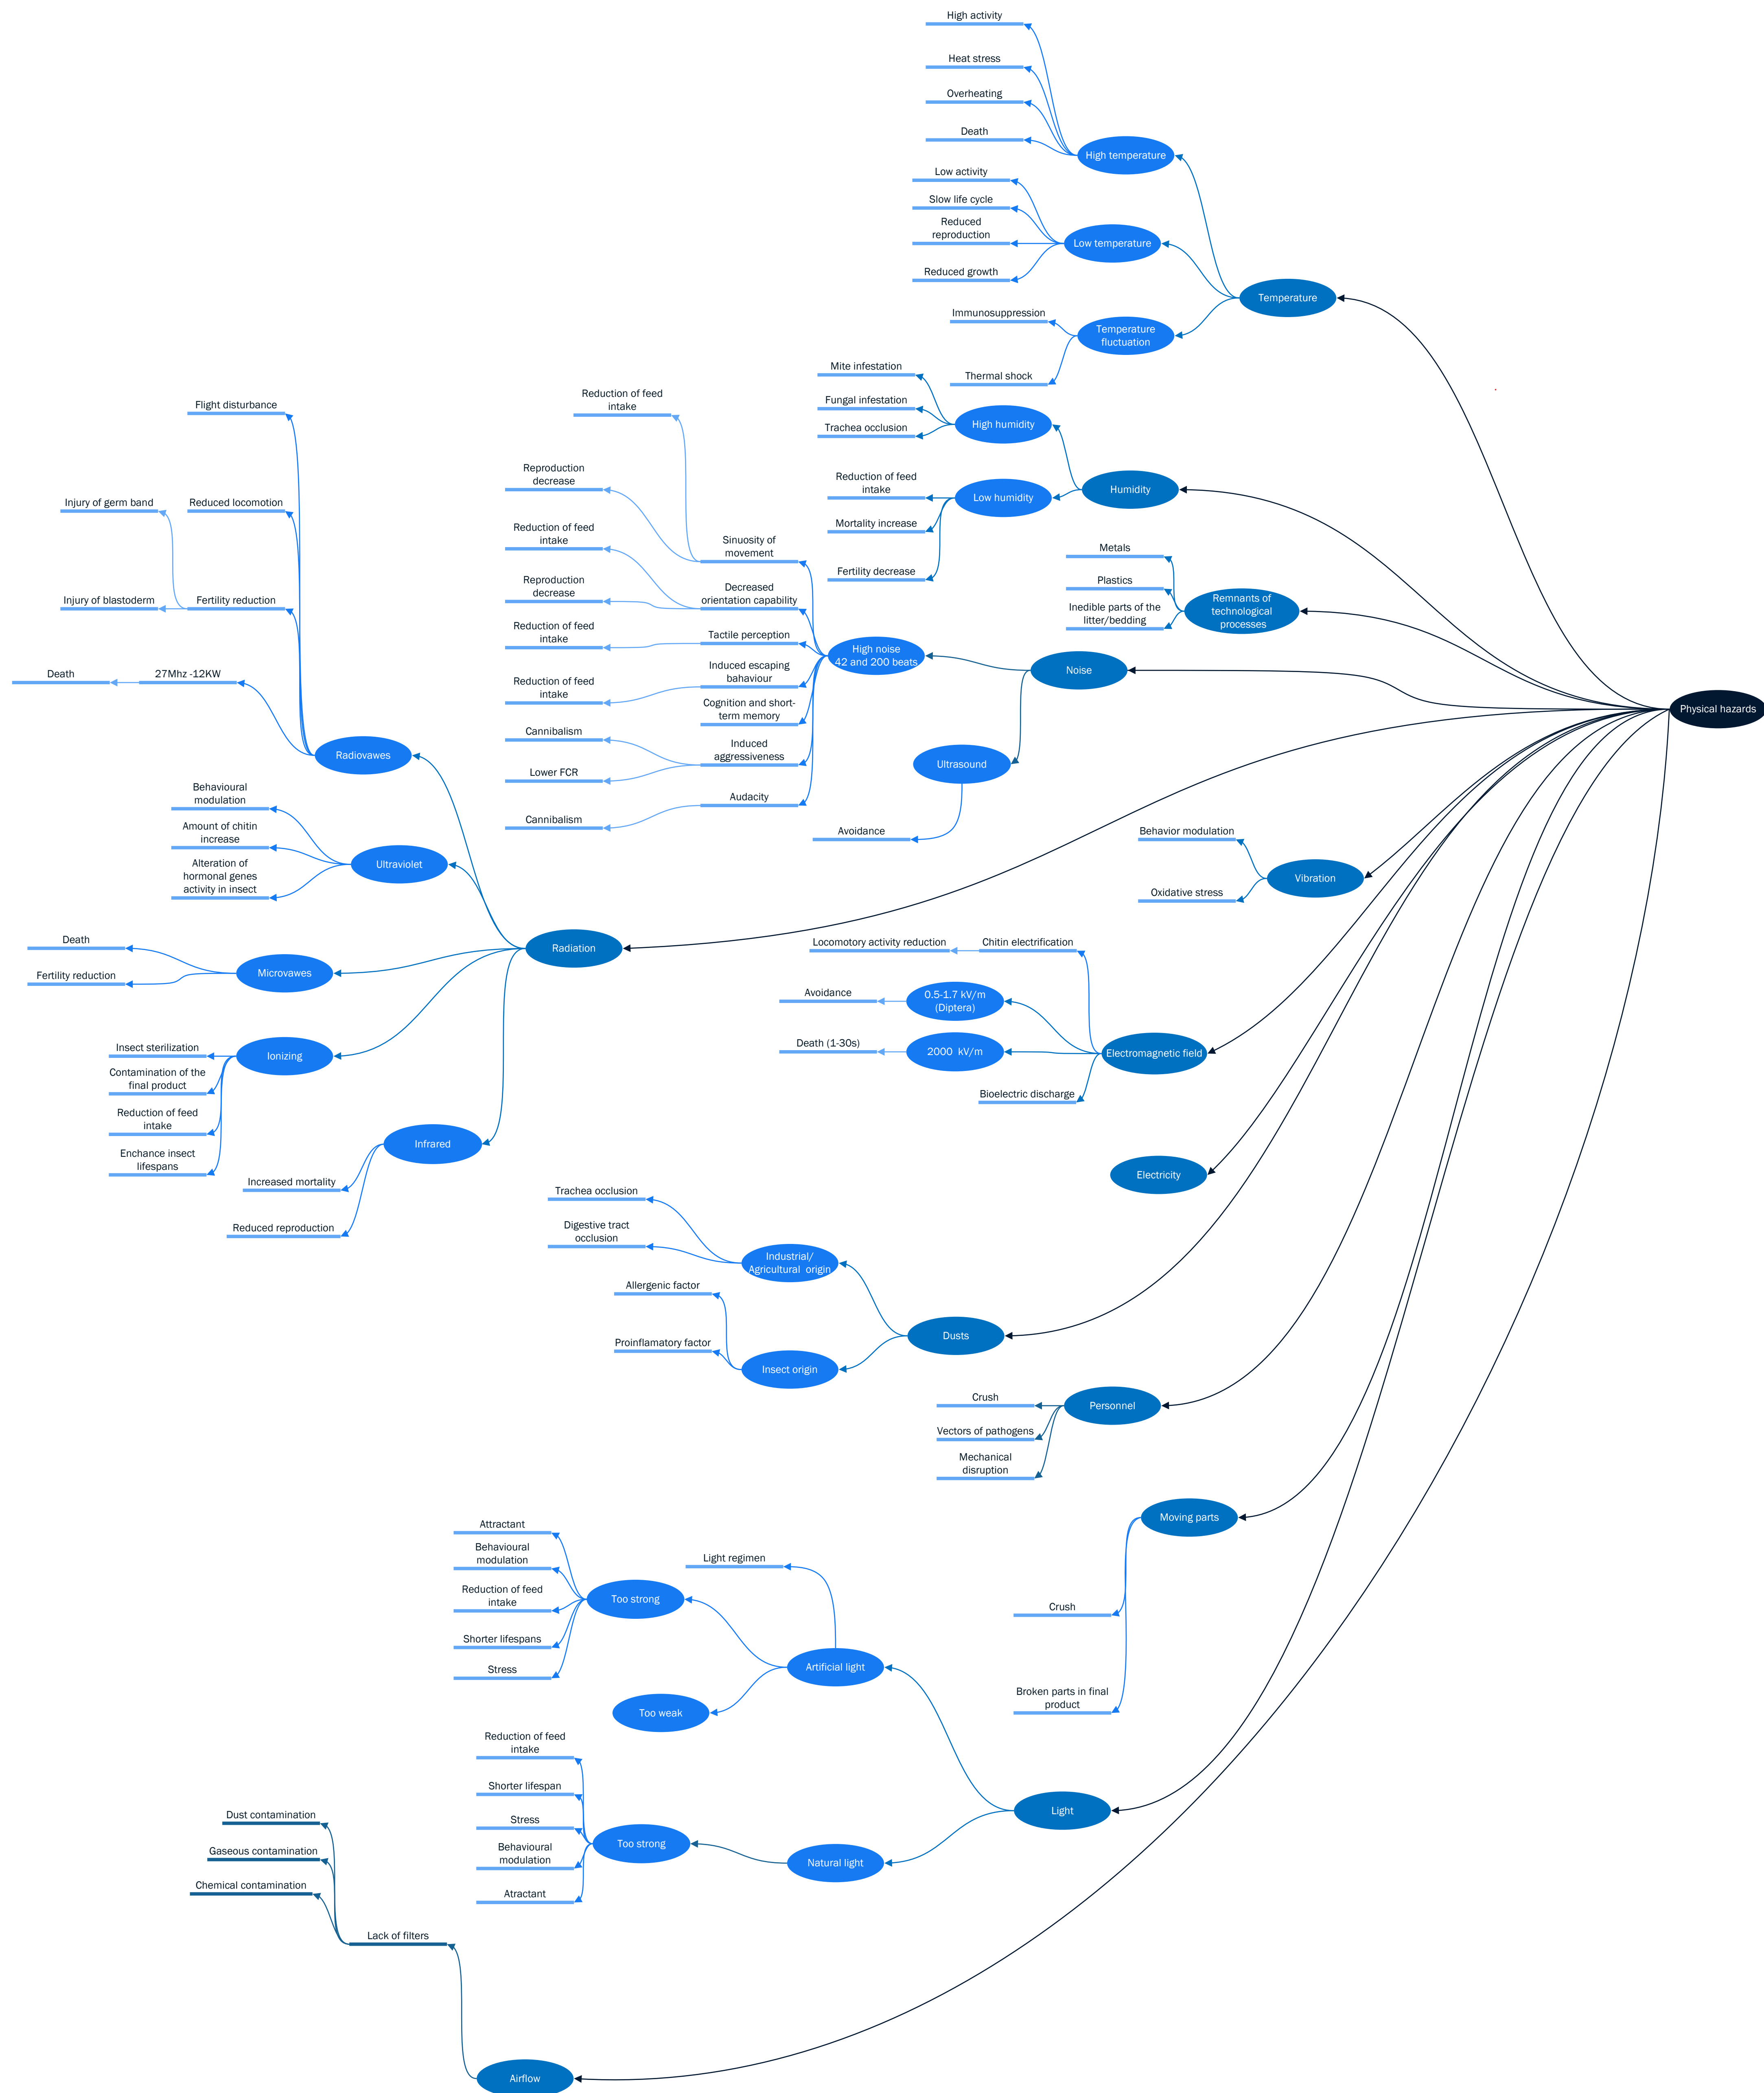

Supplement: s1 [file s1]

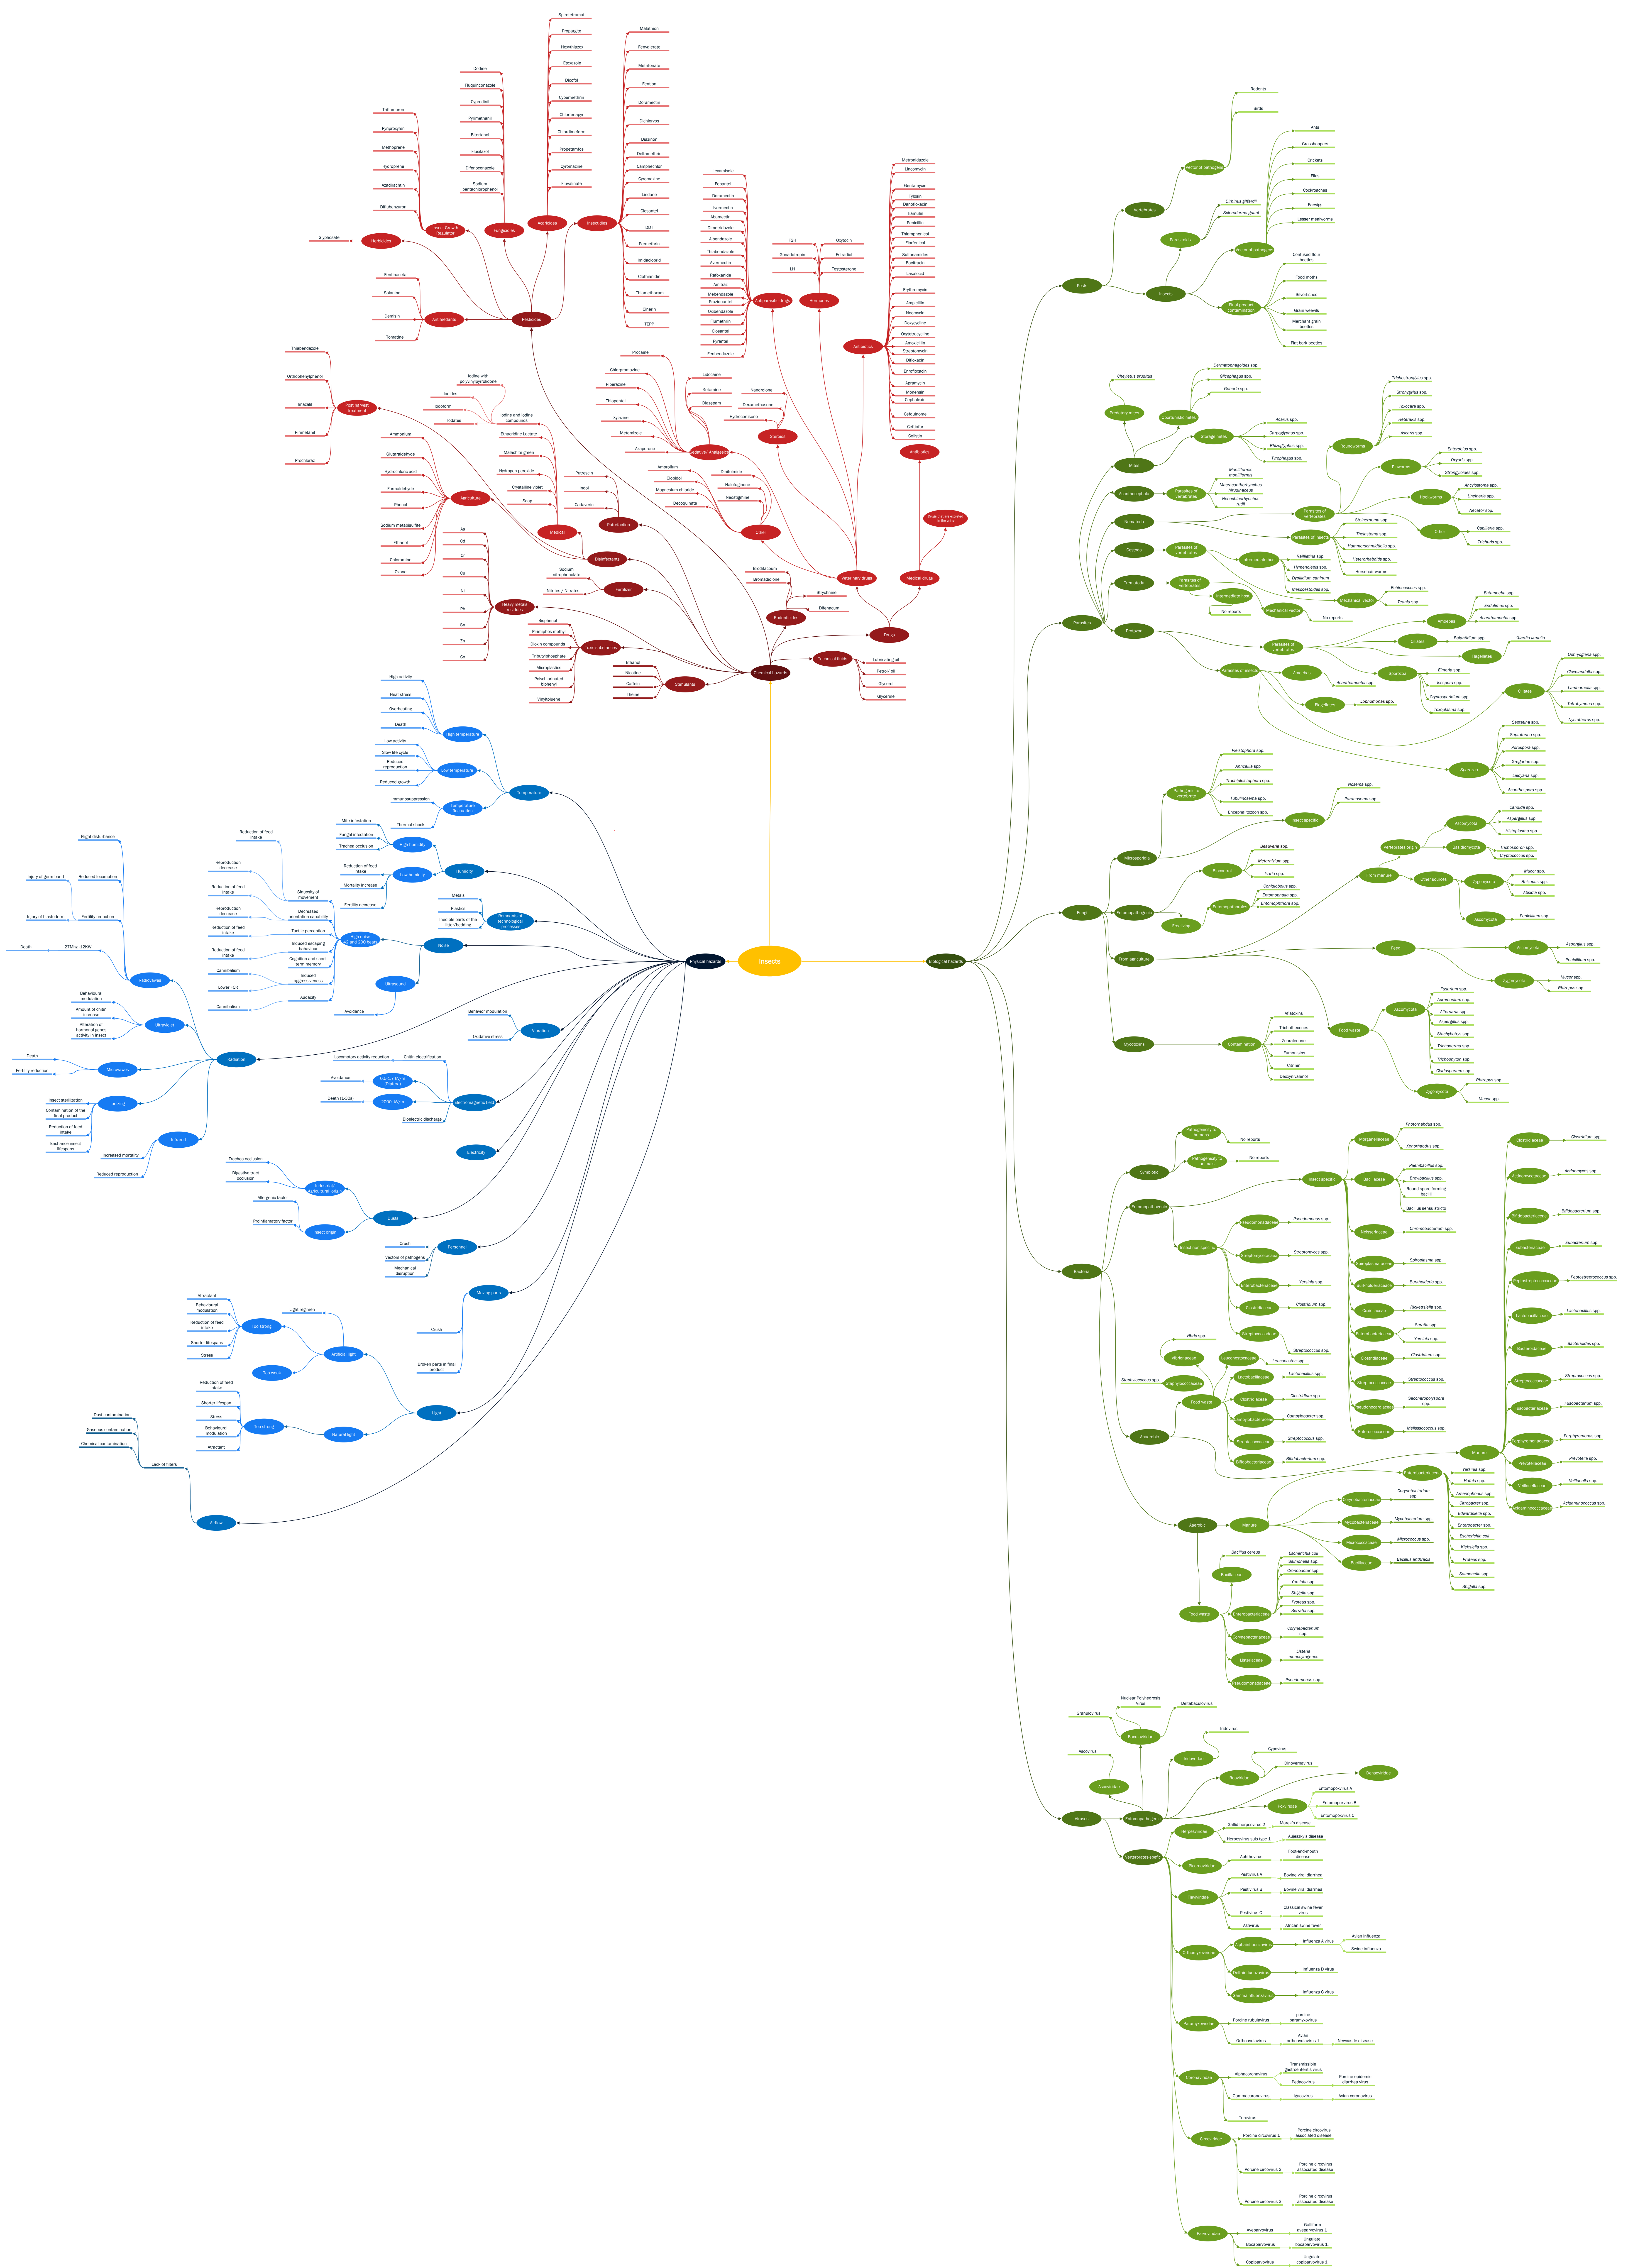

Supplement: s1 [file s1]
